# Supplementary material for: Unlocking the full potential of citric acid-synthesized carbon dots as a supercapacitor electrode material via surface functionalization
Source: Royal Society of Chemistry journal article supplement (doi:10.1039/d3nr04893d), 2023-11-21
Supplement: d3nr04893d1.pdf [file d3nr04893d1.pdf]

## Electronic Supplementary Information (ESI)

### Unlocking the Full Potential of Citric Acid-Synthesized Carbon Dots as Supercapacitor Electrode Material via Surface Functionalization

Melis Özge Alaş Çolak<sup>1</sup>, Ahmet Güngör<sup>2</sup>, Merve Buldu Akturk<sup>2</sup>, Emre Erdem<sup>2,3,4\*</sup>, Rükân Genç<sup>1,5\*</sup>

<sup>1</sup> Sabanci University, Nanotechnology Research and Application Centre, TR-34956, Istanbul, Turkey

<sup>2</sup> Faculty of Engineering and Natural Sciences, Sabanci University, TR-34956, Istanbul, Turkey

<sup>3</sup> Sabanci University Integrated Manufacturing Technologies Research and Application Center and Composite Technologies Center of Excellence, Teknopark Istanbul, Pendik, 34906, Istanbul, Turkey

<sup>4</sup> Sabanci University Center of Excellence for Functional Surfaces and Interfaces for Nano-Diagnostics (EFSUN), Orhanli, 34956 Tuzla, Istanbul, Turkey

<sup>5</sup> Department of Chemical Engineering, Engineering Faculty, Mersin University, TR-33343, Mersin, Turkey

\*Corresponding authors: [rukan.genc@sabanciuniv.edu](mailto:rukan.genc@sabanciuniv.edu)

[emre.erdem@sabanciuniv.edu](mailto:emre.erdem@sabanciuniv.edu)

Table S1: Calculation of Energy Band Gap, TEM size, and Hydrodynamic Radius for CD and CD-bis.

| Sample name | Calculation band gap energy (eV) |      | Size by TEM (d.nm) | Hydrodynamic radius (d.nm) |
|-------------|----------------------------------|------|--------------------|----------------------------|
|             | UV/Vis                           | PL   |                    |                            |
| CD          | 2.58                             | 2.53 | 24.72 ± 2.34       | 46.86± 7.75                |
| CD-bis16    | 2.61                             | 2.70 | 19.17 ± 3.13       | 31.40± 5.21                |
| CD-bis64    | 2.63                             | 2.64 | 23.58 ± 2.70       | 41.39± 6.92                |

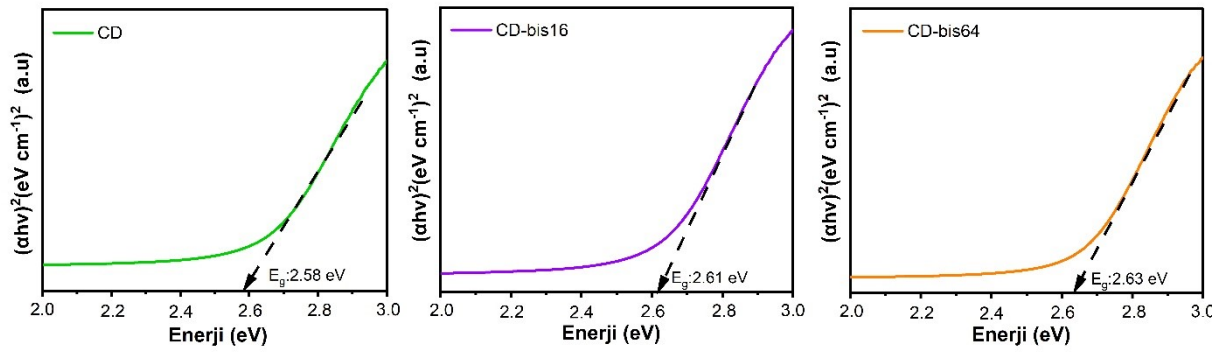

Figure S1. Tauc plot graphs which calculated from UV/Vis data of CDs.

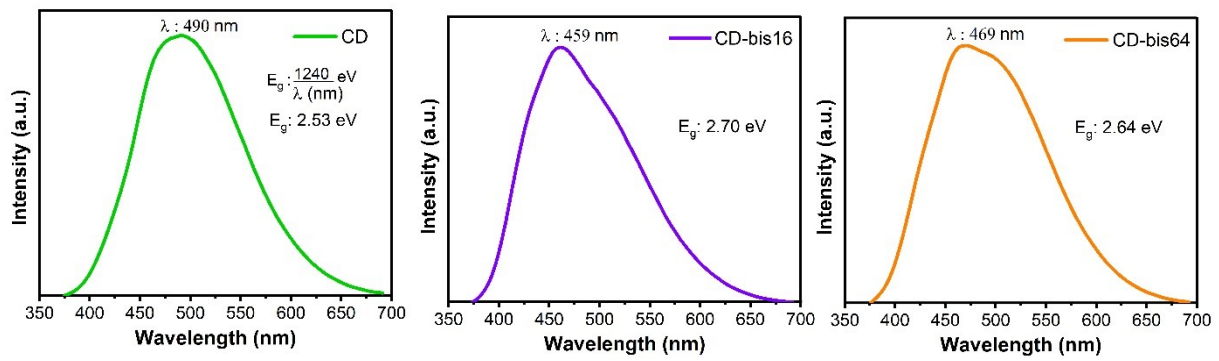

Figure S2. Determination of Band Gap Energy from the Photoluminescence of CDs.
